# Supplementary material for: BRANEnet: Embedding Multilayer Networks for Omics Data Integration
Source: Research Square preprint supplement (doi:10.21203/rs.3.rs-1588328/v1), 2022-04-27

## Intra-omics networks

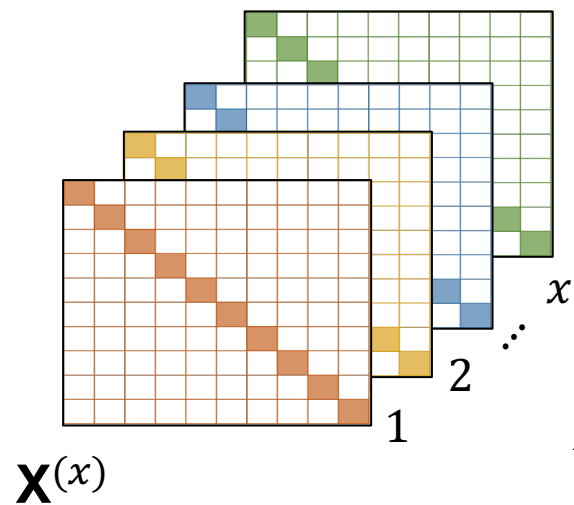

## Multilayer Network $\mathbf{G}(\bar{\mathbf{A}})$

Experimental data

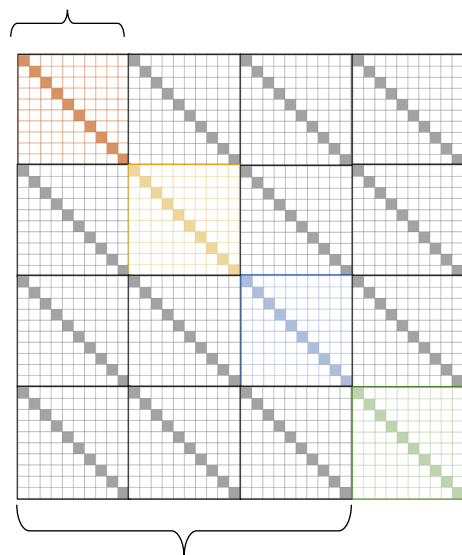

Random walk  
PPMI Matrix ( $\mathbf{S}$ )

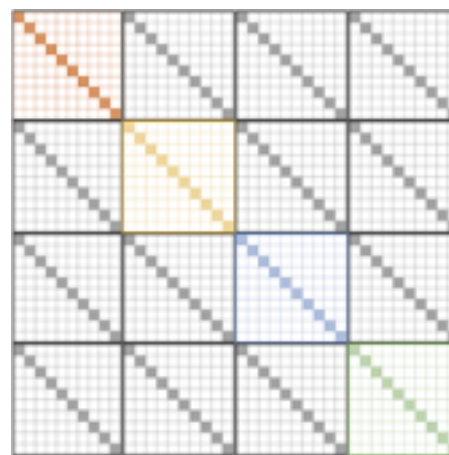

Embeddings  
( $\Omega_d$ )

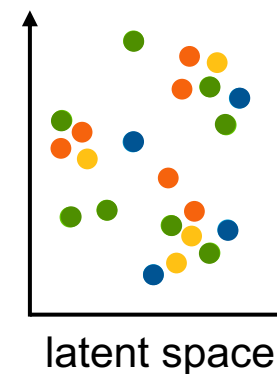

Biological *a priori*:

- Regulator binding sites (gene promoter, 3'UTR)
- Presence of epigenetic mark in gene promoter
- Phenotype information of transcript and metabolite
- Biochemical reactions (gene-compound)

## Inter-omics networks

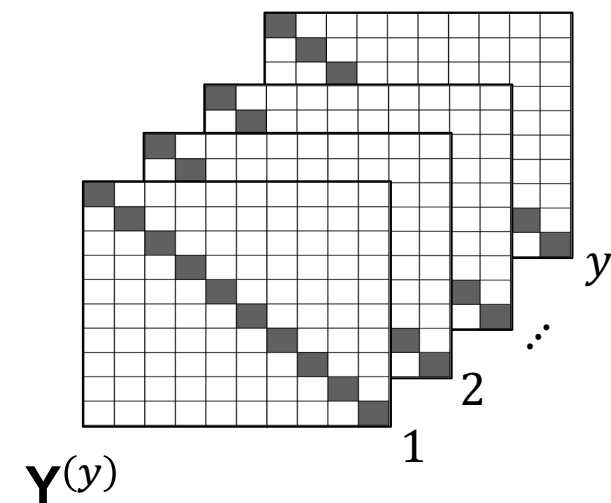

Supplement: Supplementary file 1 [file 053e271f5c263ad784643db8.zip]
