# Supplementary figures and images for: BRANEnet: Embedding Multilayer Networks for Omics Data Integration
Source: Research Square preprint supplement (doi:10.21203/rs.3.rs-1588328/v1), 2022-04-27

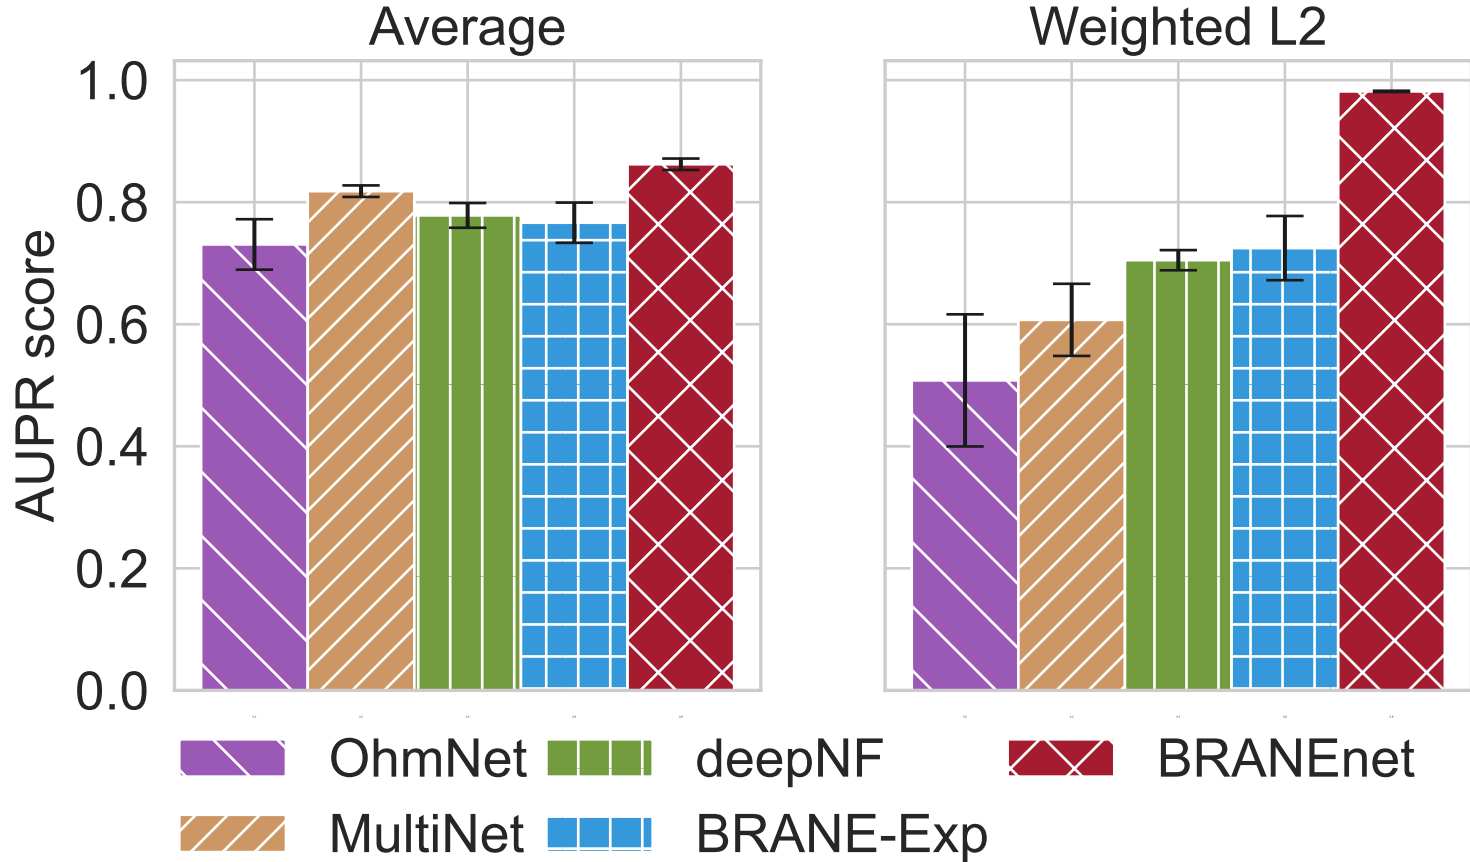

Supplement: Supplementary file 2 [file 053e271f5c263ad784643db8.zip]

MCC@threshold

0.10

0.05

0.00

0.2

0.4

0.6

0.8

threshold

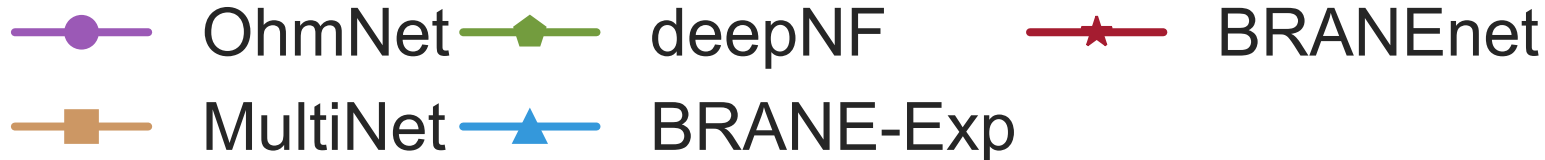

Supplement: Supplementary file 3 [file 053e271f5c263ad784643db8.zip]

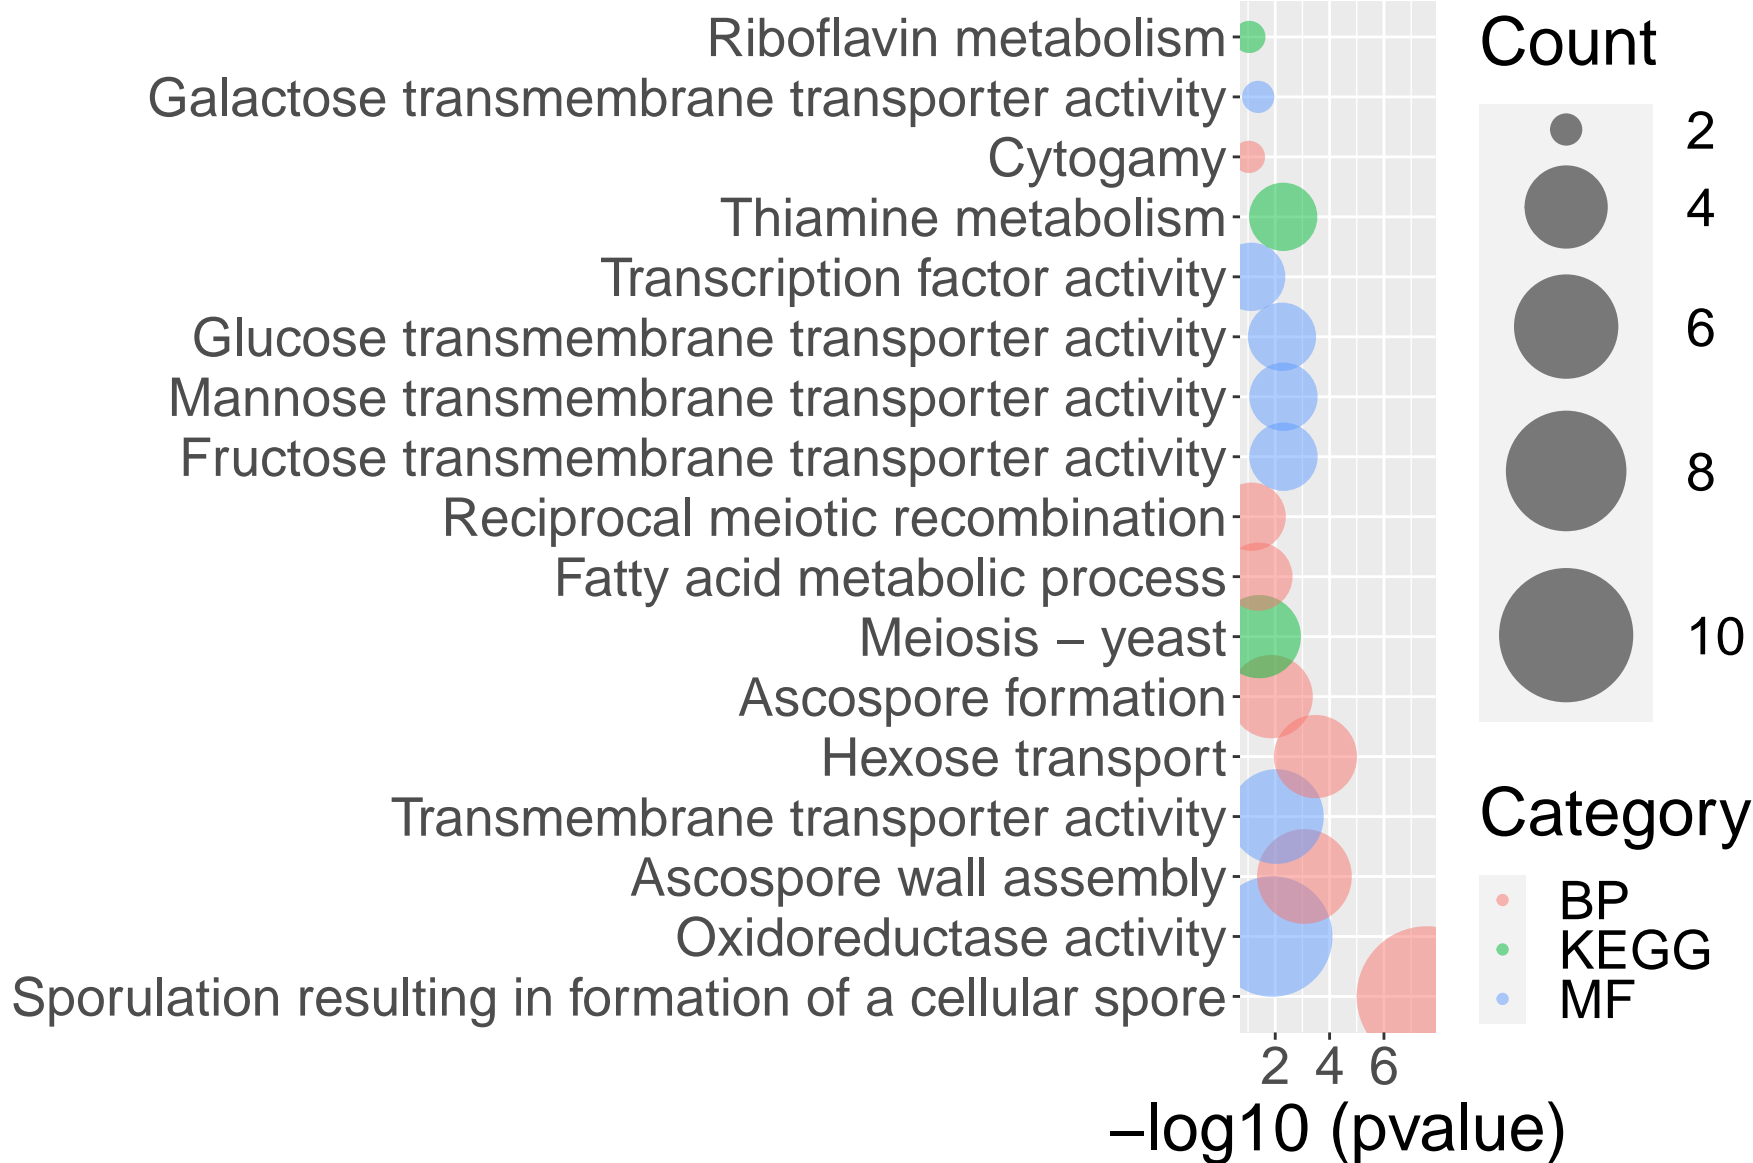

Supplement: Supplementary file 4 [file 053e271f5c263ad784643db8.zip]

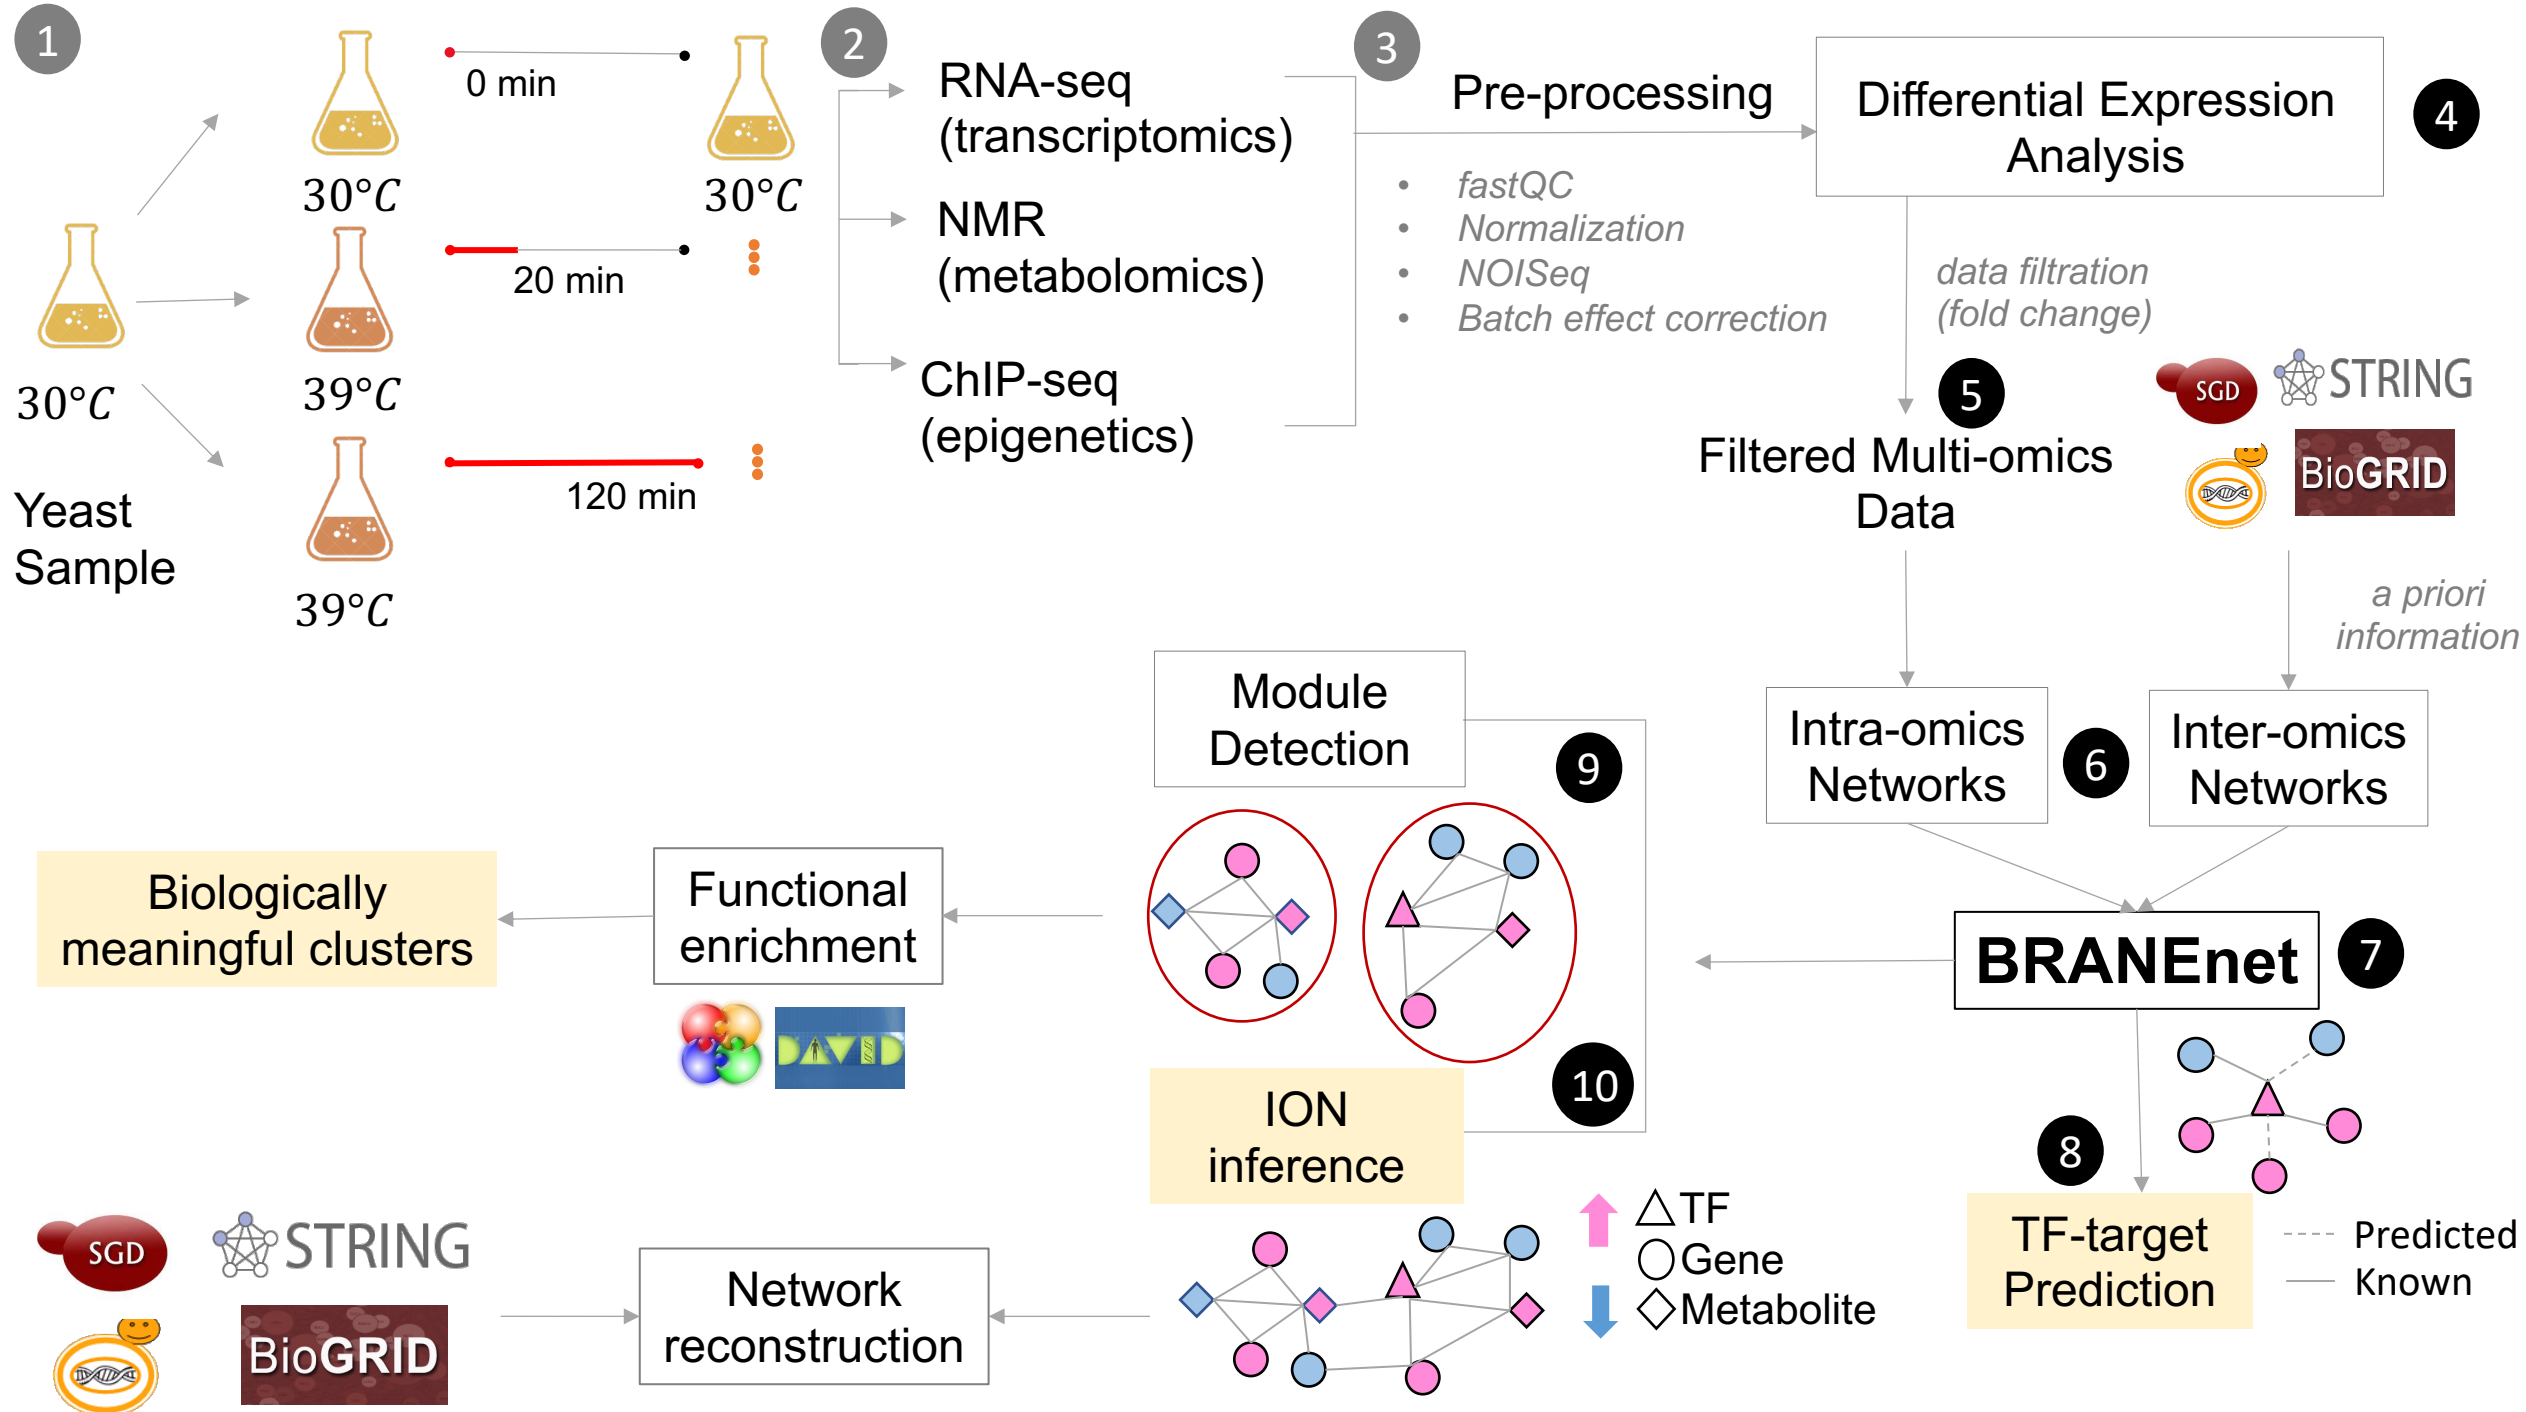

Supplement: Supplementary file 5 [file 053e271f5c263ad784643db8.zip]

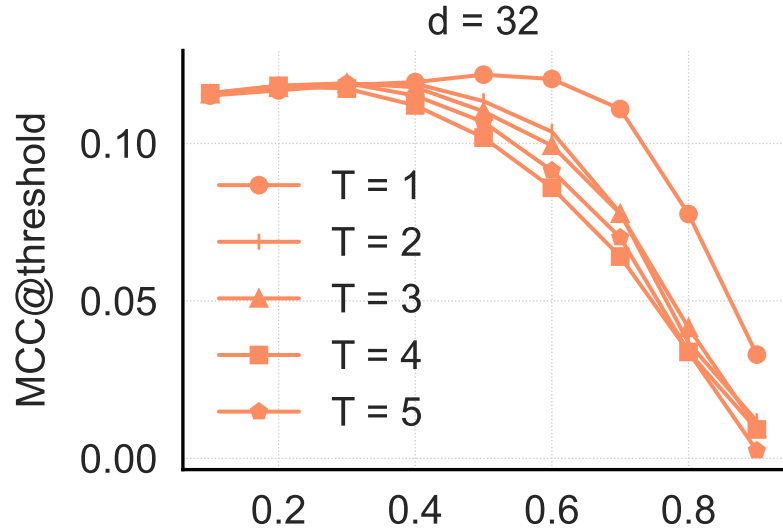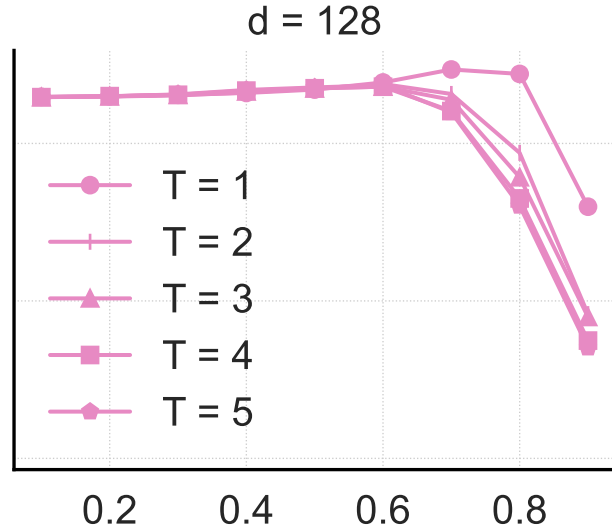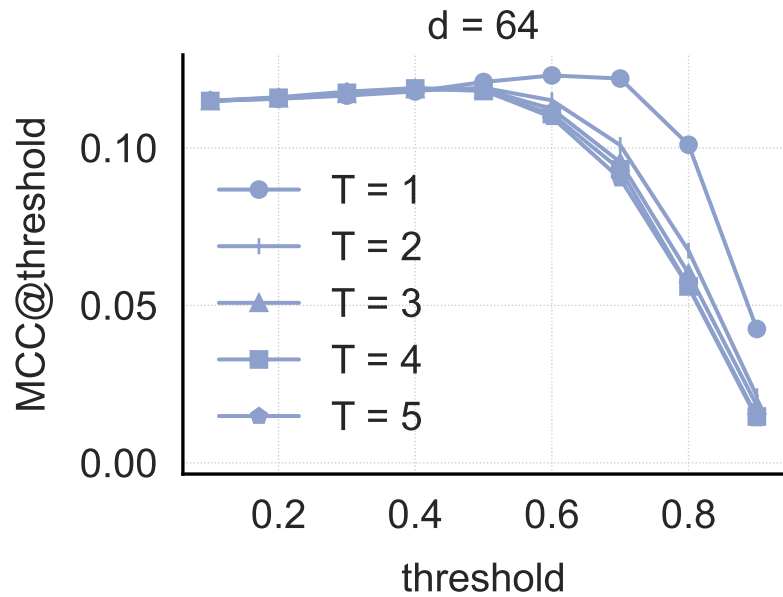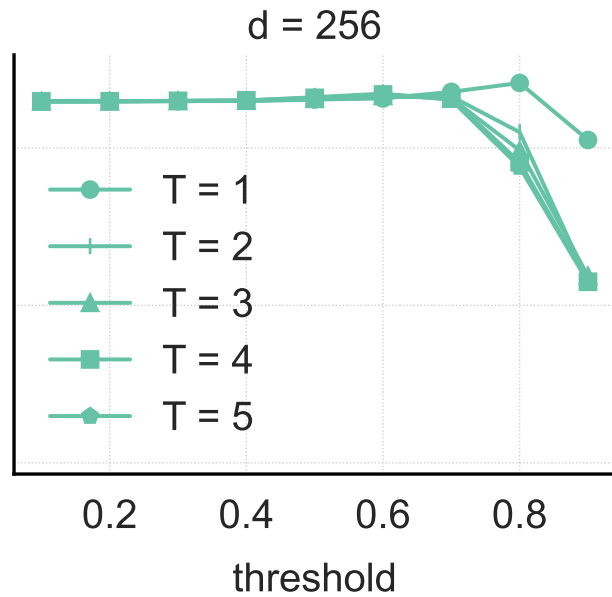

Supplement: Supplementary file 7 [file 053e271f5c263ad784643db8.zip]

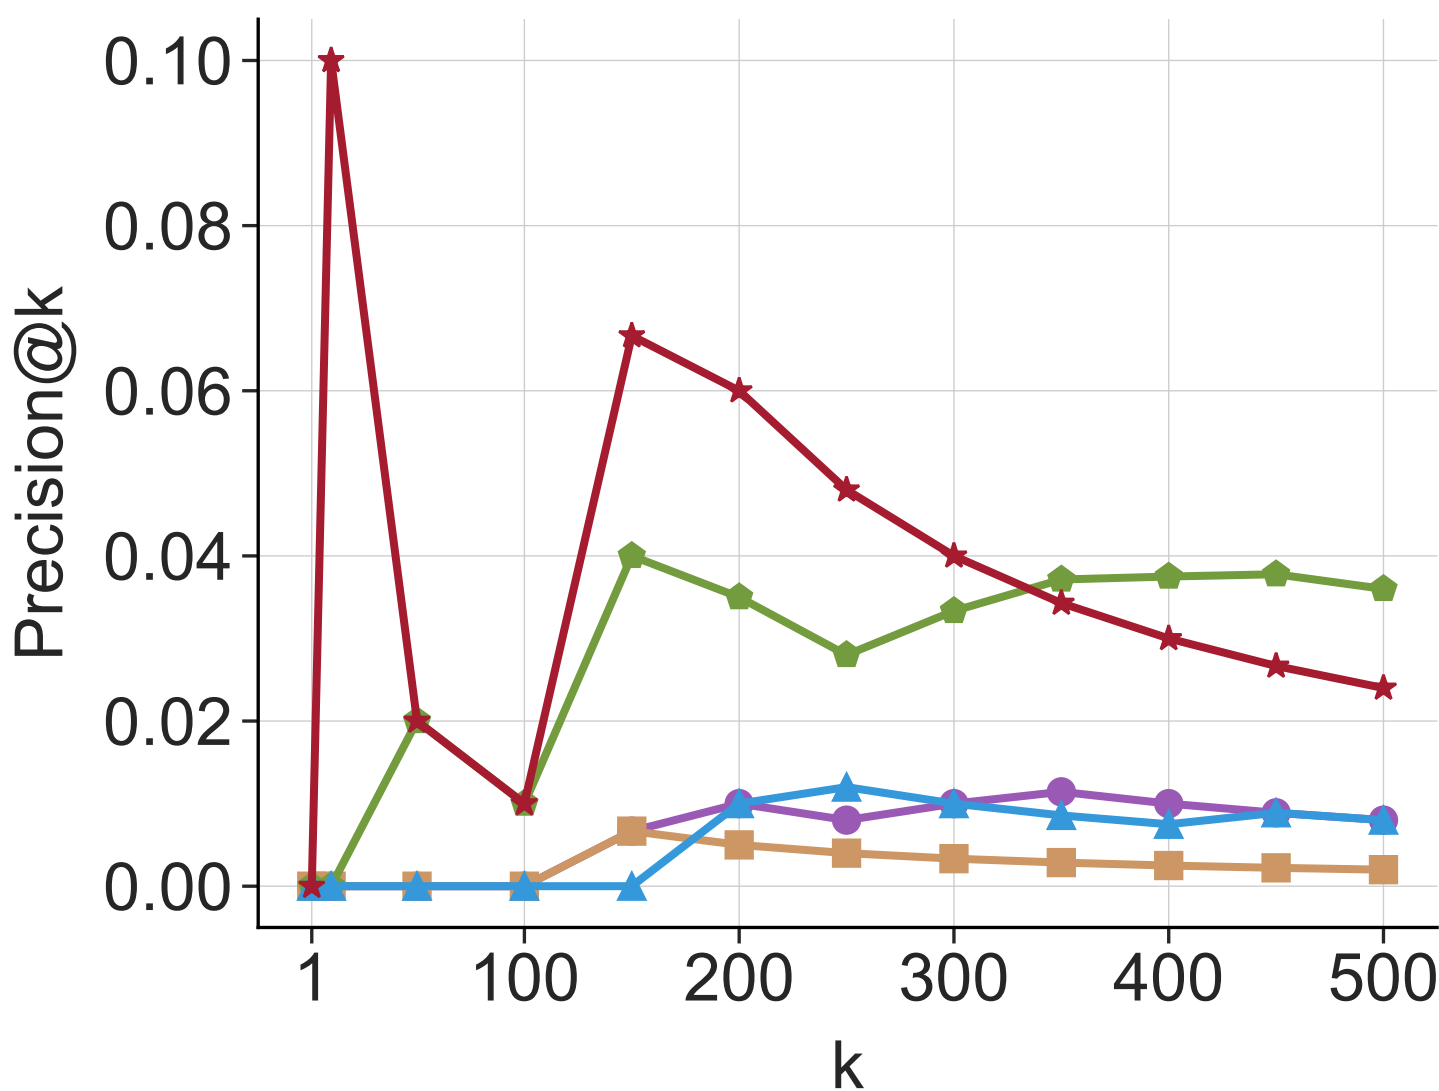

OhmNet   deepNF   BRANENet  
MultiNet   BRANE-Exp

Supplement: Supplementary file 8 [file 053e271f5c263ad784643db8.zip]

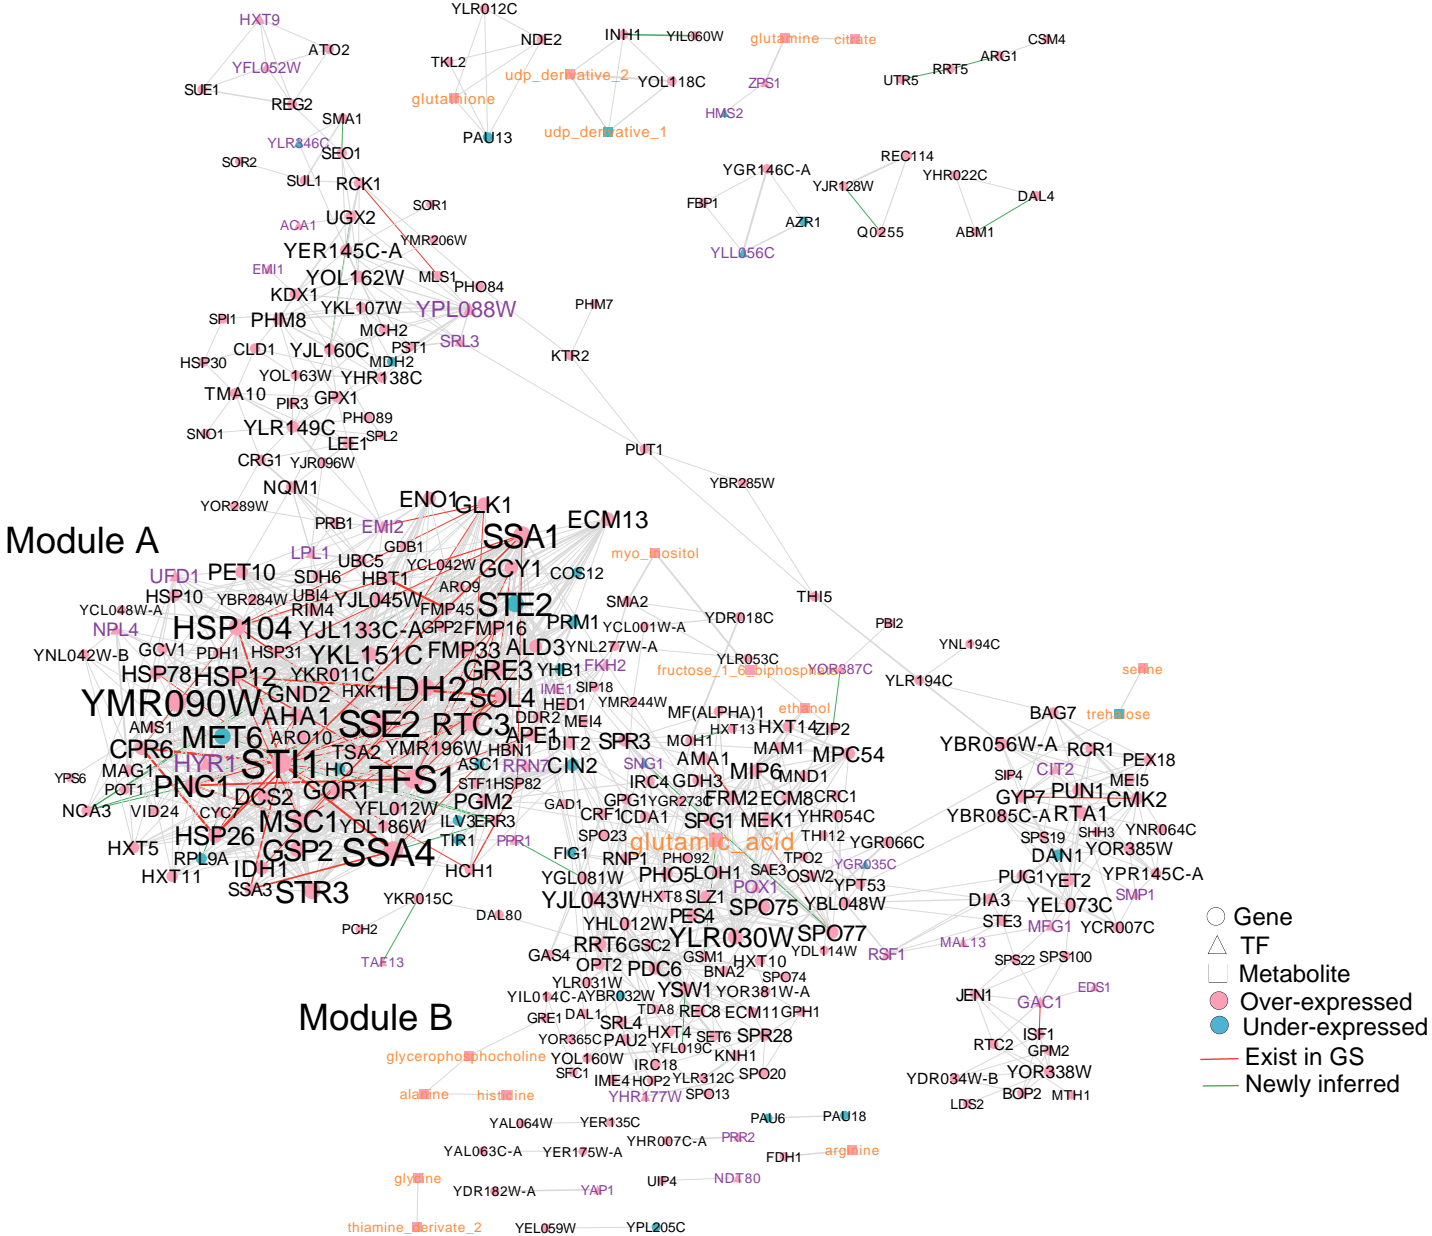

Supplement: Supplementary file 9 [file 053e271f5c263ad784643db8.zip]

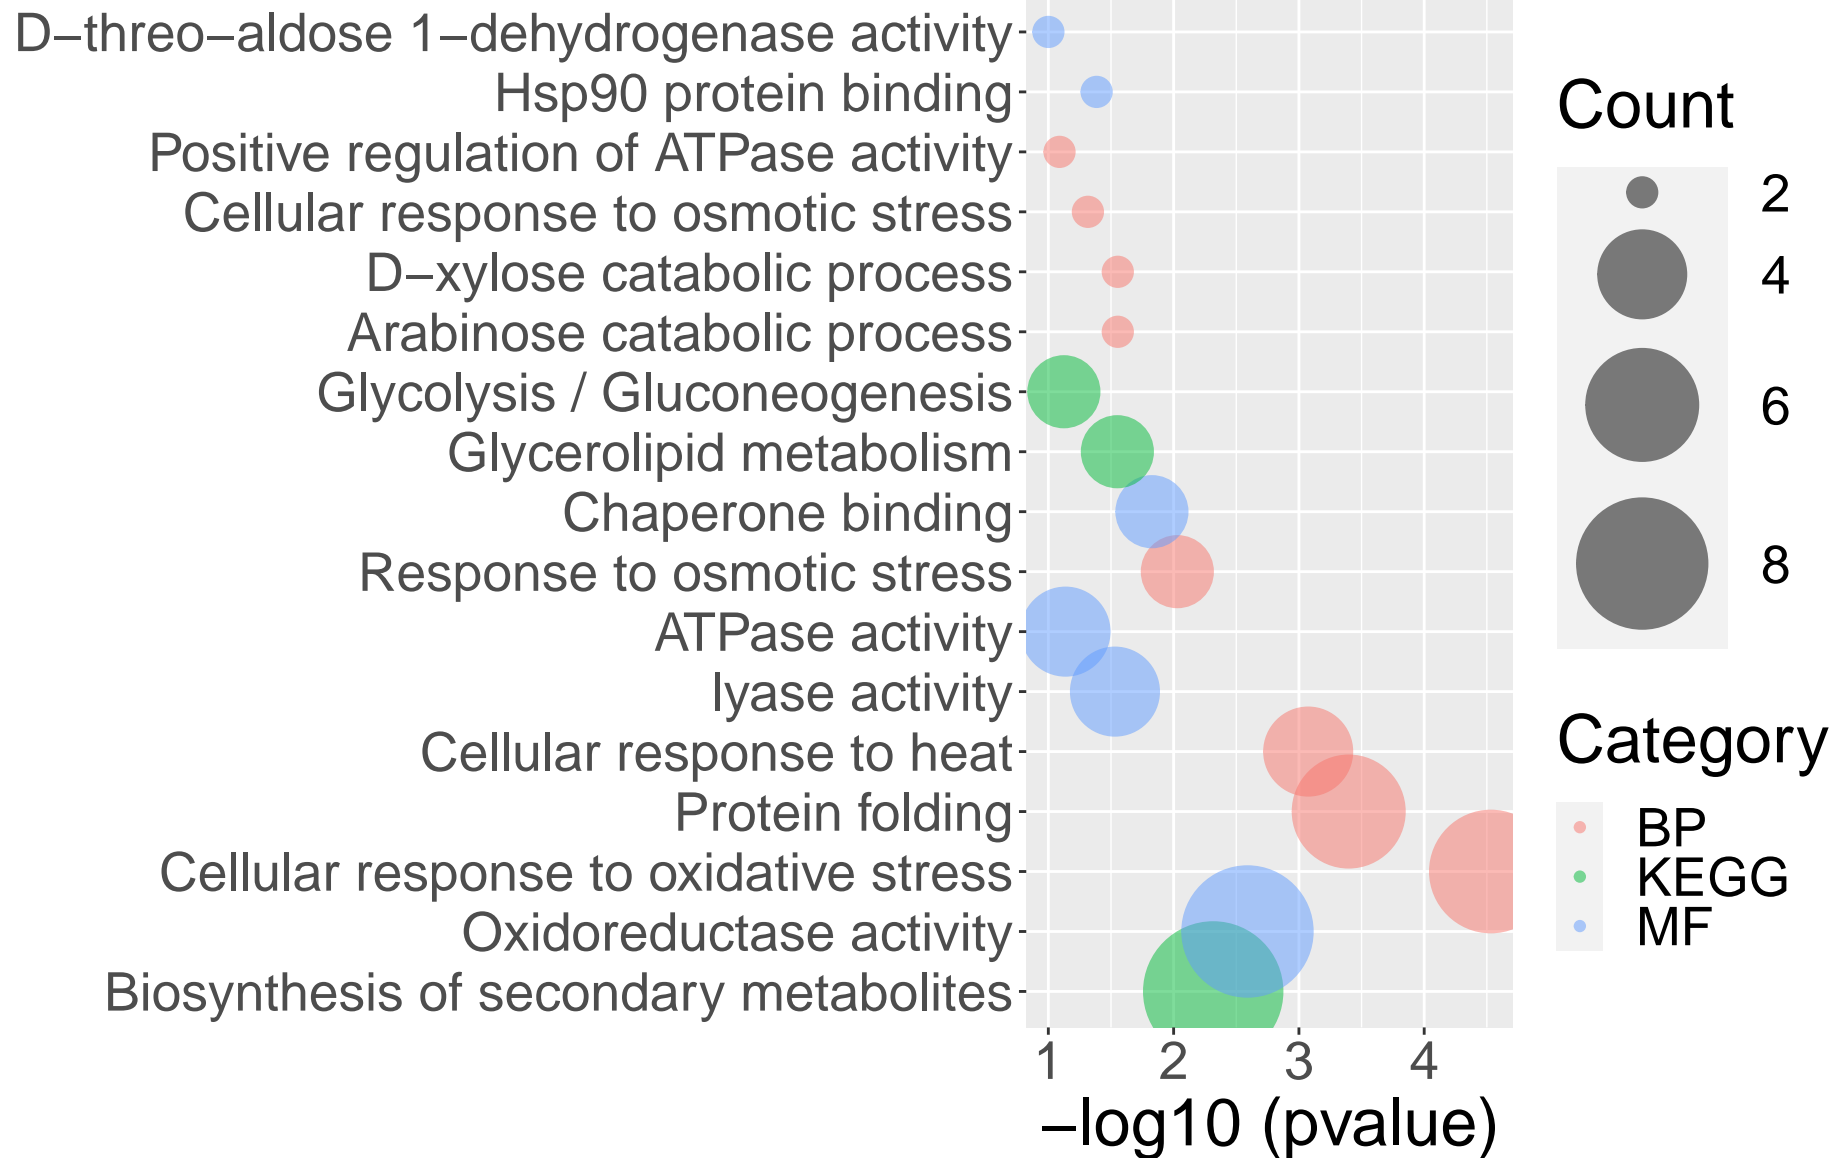

Supplement: Supplementary file 10 [file 053e271f5c263ad784643db8.zip]
